# Supplementary material for: Characterization of Two Distinct Nucleosome Remodeling and Deacetylase (NuRD) Complex Assemblies in Embryonic Stem Cells
Source: PubMed Central journal article supplement (PMC4813707; doi:10.1074/mcp.m115.053207), 2015-12-29
Supplement: 10.1074_M115.053207_mcp.M115.053207-2.pdf [file 10.1074_M115.053207_mcp.M115.053207-2.pdf]

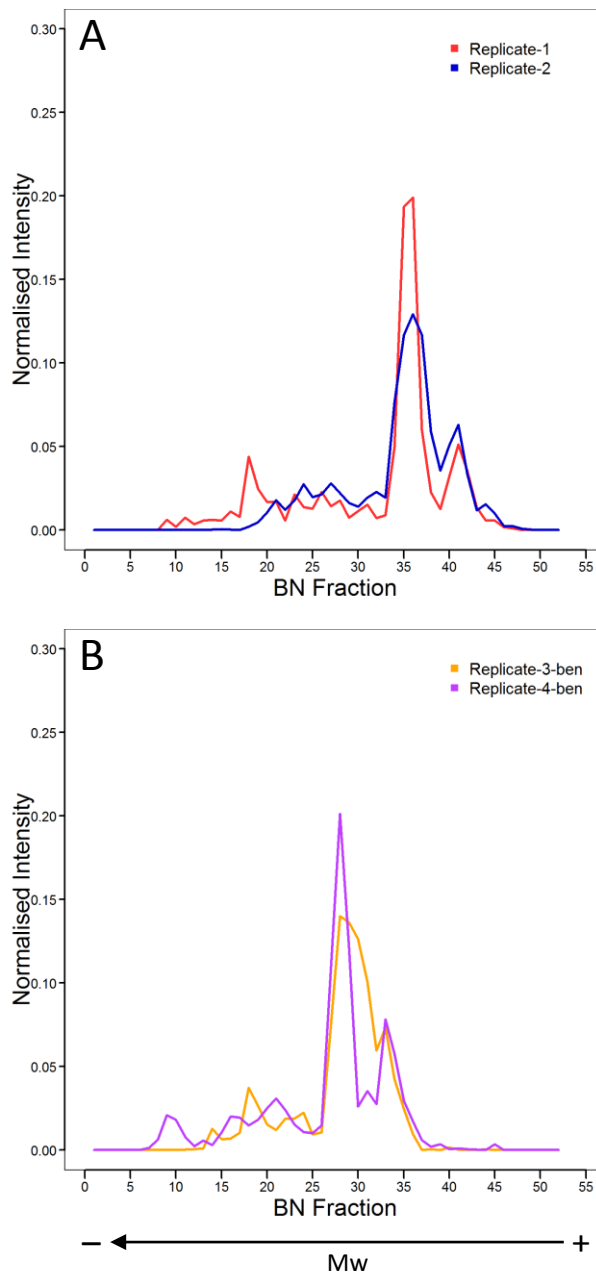

**Supplementary Figure S2. Reproducibility of Blue Native PAGE migration profiles.** A, Mta2 migration profiles in two independent replicate experiments. The profiles were aligned using the fraction with the highest intensity for Mta2 to allow for cutting differences between experiments. BN-PAGE fractions were numbered from the first fraction of the left-most profile. B, Replicates 3 and 4 had benzonase added during the affinity purification.
