# Supplementary material for: Characterization of Two Distinct Nucleosome Remodeling and Deacetylase (NuRD) Complex Assemblies in Embryonic Stem Cells
Source: PubMed Central journal article supplement (PMC4813707; doi:10.1074/mcp.m115.053207), 2015-12-29
Supplement: 10.1074_M115.053207_mcp.M115.053207-3.pdf [file 10.1074_M115.053207_mcp.M115.053207-3.pdf]

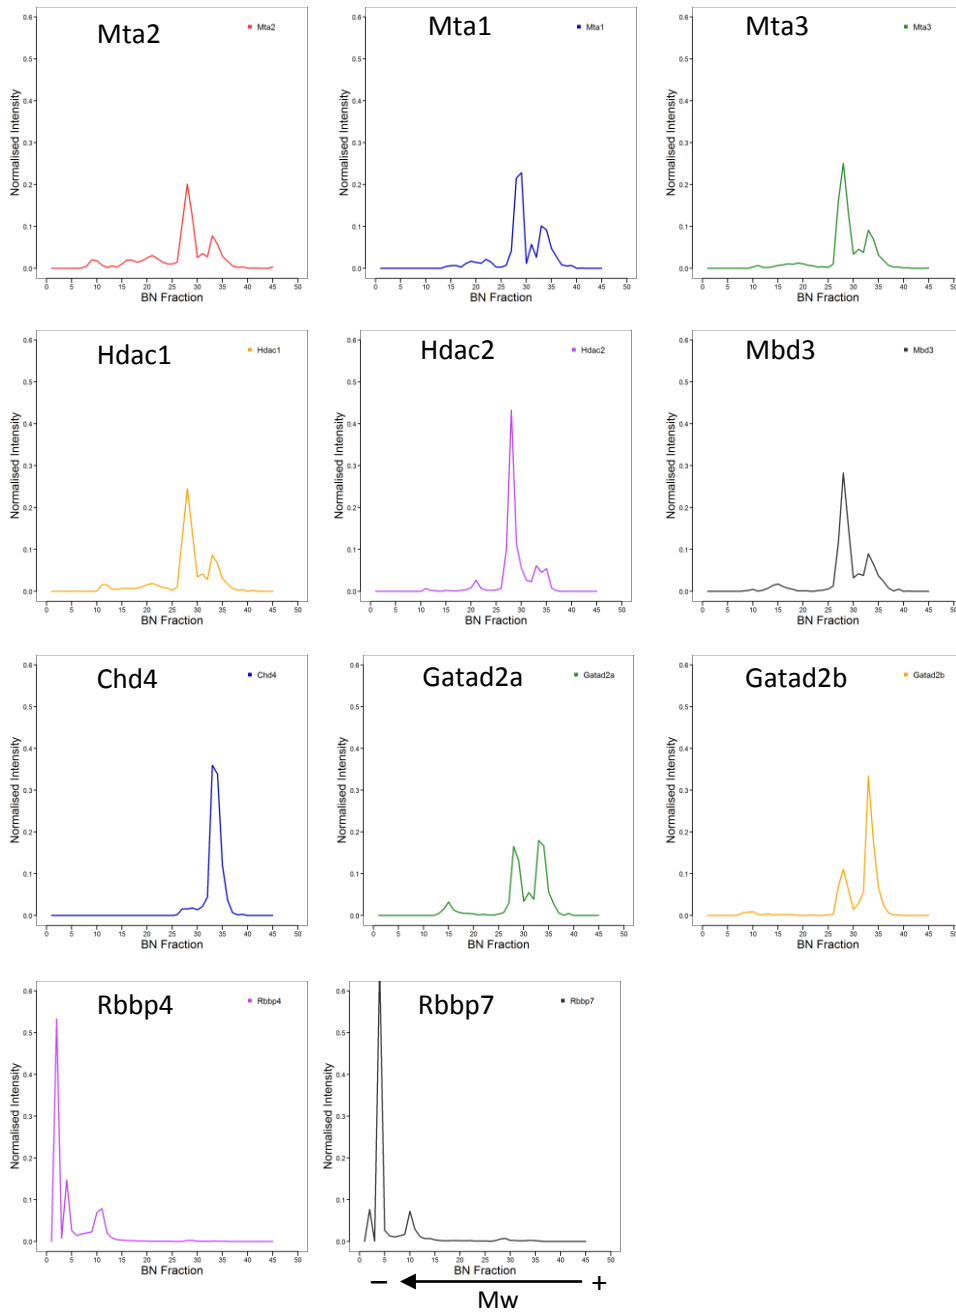

**Supplementary Figure S3. Individual BN-PAGE migration profiles of NuRD core subunits.** The profiles were derived from a representative benzonase-treated experiment.
