# Supplementary material for: Characterization of Two Distinct Nucleosome Remodeling and Deacetylase (NuRD) Complex Assemblies in Embryonic Stem Cells
Source: PubMed Central journal article supplement (PMC4813707; doi:10.1074/mcp.m115.053207), 2015-12-29
Supplement: 10.1074_M115.053207_mcp.M115.053207-4.pdf [file 10.1074_M115.053207_mcp.M115.053207-4.pdf]

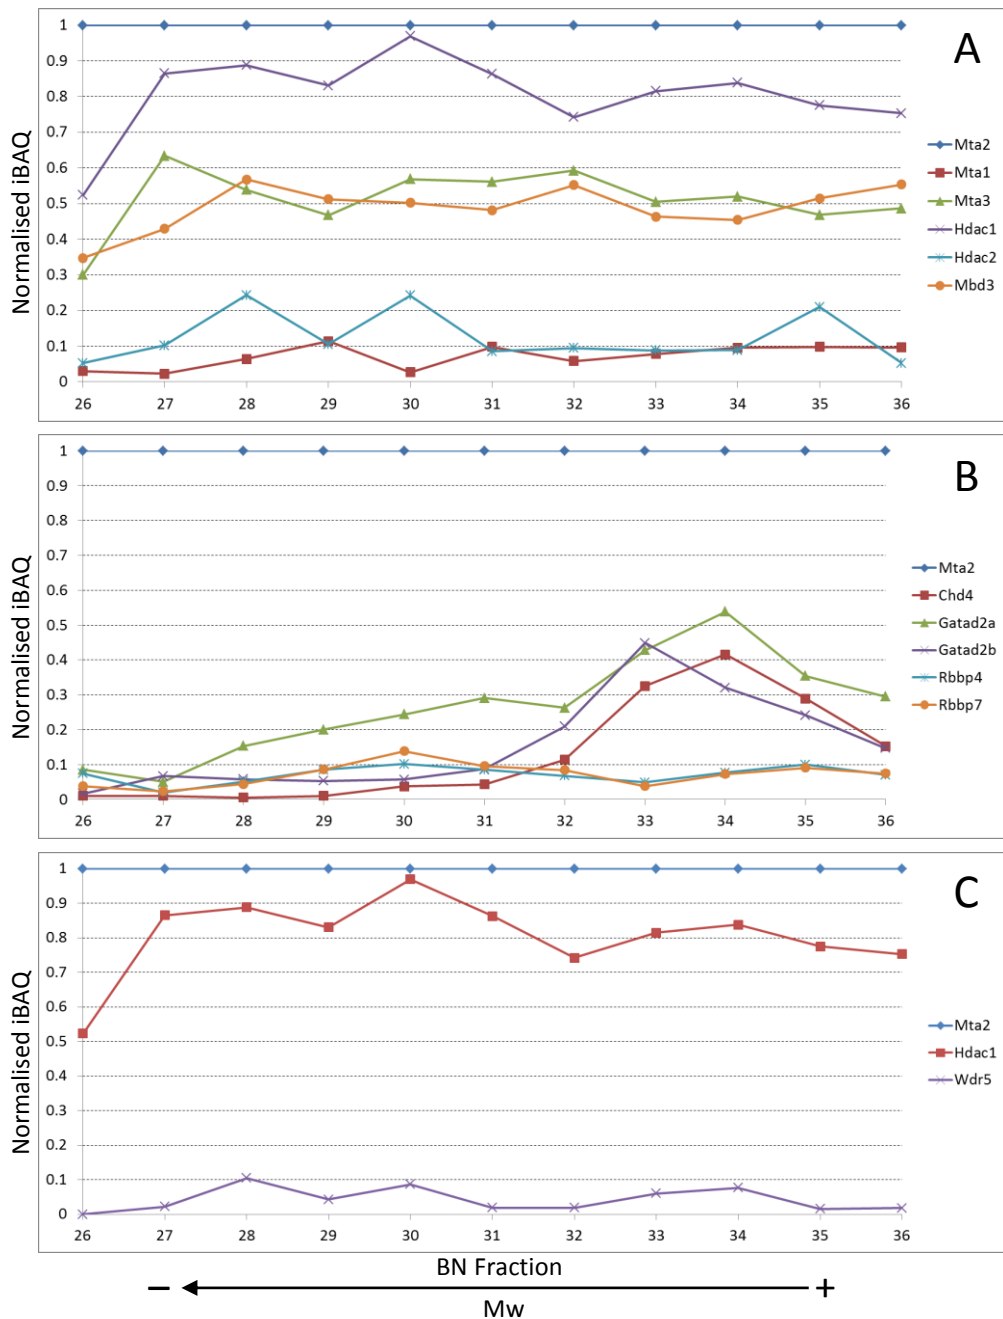

**Supplementary Figure S4. Correlation of core NuRD subunit migration profiles with the bait protein Mta2.** iBAQ values were derived for NuRD core subunits and Wdr5 in each fraction and normalised to the bait protein Mta2. The analysis was performed in a representative benzonase-treated replicate. A, Mta1, Mta2, Mta3, Hdac1-2, Mbd3. B, Chd4, Gatad2a, Gatad2b, Rbbp4, Rbbp7. C, Wdr5, with Hdac1 and Mta2 as reference.
