# Supplementary material for: Characterization of Two Distinct Nucleosome Remodeling and Deacetylase (NuRD) Complex Assemblies in Embryonic Stem Cells
Source: PubMed Central journal article supplement (PMC4813707; doi:10.1074/mcp.m115.053207), 2015-12-29
Supplement: 10.1074_M115.053207_mcp.M115.053207-7.pdf [file 10.1074_M115.053207_mcp.M115.053207-7.pdf]

**Supplementary Table S2. GO Biological process term enrichment for NuRD and Wdr5 targets.** The enrichment is shown for Wdr5-only, NuRD-only and common NuRD-Wdr5 targets.

| <b>Wdr5</b>                                                                      | <b>P-Value</b> | <b>Bonferroni</b> |
|----------------------------------------------------------------------------------|----------------|-------------------|
| <b>Term</b>                                                                      | <b>P-Value</b> | <b>Bonferroni</b> |
| GO:0044237~cellular metabolic process                                            | 3.21E-130      | 1.75E-126         |
| GO:0044260~cellular macromolecule metabolic process                              | 1.19E-104      | 6.48E-101         |
| GO:0044238~primary metabolic process                                             | 2.01E-99       | 1.10E-95          |
| GO:0008152~metabolic process                                                     | 2.97E-95       | 1.62E-91          |
| GO:0043170~macromolecule metabolic process                                       | 6.06E-84       | 3.31E-80          |
| GO:0034641~cellular nitrogen compound metabolic process                          | 1.39E-59       | 7.58E-56          |
| GO:0006807~nitrogen compound metabolic process                                   | 5.79E-57       | 3.16E-53          |
| GO:0006139~nucleobase, nucleoside, nucleotide and nucleic acid metabolic process | 1.44E-55       | 7.86E-52          |
| GO:0044267~cellular protein metabolic process                                    | 9.08E-50       | 4.96E-46          |
| GO:0010467~gene expression                                                       | 1.94E-48       | 1.06E-44          |
| GO:0044249~cellular biosynthetic process                                         | 8.56E-44       | 4.67E-40          |
| GO:0009058~biosynthetic process                                                  | 1.02E-43       | 5.59E-40          |
| GO:0009059~macromolecule biosynthetic process                                    | 7.44E-37       | 4.06E-33          |
| GO:0034645~cellular macromolecule biosynthetic process                           | 1.32E-36       | 7.18E-33          |
| GO:0016070~RNA metabolic process                                                 | 6.89E-33       | 3.76E-29          |
| GO:0019538~protein metabolic process                                             | 3.98E-30       | 2.17E-26          |
| GO:0006396~RNA processing                                                        | 1.93E-28       | 1.05E-24          |
| GO:0007049~cell cycle                                                            | 1.46E-23       | 7.98E-20          |
| GO:0043412~biopolymer modification                                               | 1.49E-21       | 8.12E-18          |
| GO:0006996~organelle organization                                                | 3.21E-21       | 1.75E-17          |

| <b>NuRD</b>                                                            | <b>P-Value</b> | <b>Bonferroni</b> |
|------------------------------------------------------------------------|----------------|-------------------|
| <b>Term</b>                                                            | <b>P-Value</b> | <b>Bonferroni</b> |
| GO:0009653~anatomical structure morphogenesis                          | 6.52E-05       | 0.08565084        |
| GO:0032502~developmental process                                       | 1.09E-04       | 0.13859055        |
| GO:0003002~regionalization                                             | 1.37E-04       | 0.17169145        |
| GO:0007275~multicellular organismal development                        | 2.84E-04       | 0.32288213        |
| GO:0007389~pattern specification process                               | 4.21E-04       | 0.43895875        |
| GO:0048513~organ development                                           | 5.53E-04       | 0.53211942        |
| GO:0048856~anatomical structure development                            | 6.85E-04       | 0.61008599        |
| GO:0006357~regulation of transcription from RNA polymerase II promoter | 0.0014514      | 0.86407929        |
| GO:0050793~regulation of developmental process                         | 0.0015238      | 0.87696747        |
| GO:0048731~system development                                          | 0.0019426      | 0.9308638         |

| <b>Wdr5 - NuRD overlap</b>                           | <b>P-Value</b> | <b>Bonferroni</b> |
|------------------------------------------------------|----------------|-------------------|
| <b>Term</b>                                          | <b>P-Value</b> | <b>Bonferroni</b> |
| GO:0009987~cellular process                          | 1.50E-31       | 4.65E-28          |
| GO:0032502~developmental process                     | 8.40E-25       | 2.60E-21          |
| GO:0007275~multicellular organismal development      | 9.23E-23       | 2.86E-19          |
| GO:0048856~anatomical structure development          | 7.53E-21       | 2.33E-17          |
| GO:0048519~negative regulation of biological process | 2.73E-20       | 8.46E-17          |
| GO:0048523~negative regulation of cellular process   | 3.48E-20       | 1.08E-16          |
| GO:0048731~system development                        | 6.12E-20       | 1.90E-16          |
| GO:0016043~cellular component organization           | 1.53E-18       | 4.75E-15          |
| GO:0048522~positive regulation of cellular process   | 3.37E-18       | 1.05E-14          |
| GO:0048518~positive regulation of biological process | 2.73E-17       | 8.47E-14          |
| GO:0048869~cellular developmental process            | 2.14E-16       | 6.88E-13          |
| GO:0009653~anatomical structure morphogenesis        | 5.36E-16       | 1.72E-12          |
| GO:0030154~cell differentiation                      | 1.39E-15       | 4.47E-12          |
| GO:0048513~organ development                         | 4.42E-15       | 1.38E-11          |
| GO:0031323~regulation of cellular metabolic process  | 1.26E-14       | 3.92E-11          |
