# Supplementary material for: Characterization of Two Distinct Nucleosome Remodeling and Deacetylase (NuRD) Complex Assemblies in Embryonic Stem Cells
Source: PubMed Central journal article supplement (PMC4813707; doi:10.1074/mcp.m115.053207), 2015-12-29
Supplement: 10.1074_M115.053207_mcp.M115.053207-8.pdf [file 10.1074_M115.053207_mcp.M115.053207-8.pdf]

**Supplementary Table S3. GO Biological process term enrichment for NuRD and Sall4.** Enriched terms were clustered and clusters with the highest enrichment score are shown. NuRD only, Sall4 only and common NuRD-Sall4 target gene GO term enrichment is shown.

| <b>Sall4</b>                                                                                   | <b>PValue</b> | <b>Bonferroni</b> |
|------------------------------------------------------------------------------------------------|---------------|-------------------|
| Enrichment Score: 4.114761390950519                                                            |               |                   |
| <b>Term</b>                                                                                    | <b>PValue</b> | <b>Bonferroni</b> |
| GO:0009987~cellular process                                                                    | 1.219E-06     | 0.002114408       |
| GO:0080090~regulation of primary metabolic process                                             | 1.495E-06     | 0.002592183       |
| GO:0019222~regulation of metabolic process                                                     | 2.044E-06     | 0.0035429         |
| GO:0060255~regulation of macromolecule metabolic process                                       | 3.603E-06     | 0.006235131       |
| GO:0044260~cellular macromolecule metabolic process                                            | 4.853E-06     | 0.008388892       |
| GO:0019219~regulation of nucleobase, nucleoside, nucleotide and nucleic acid metabolic process | 5.053E-06     | 0.008733313       |
| GO:0010468~regulation of gene expression                                                       | 5.557E-06     | 0.009599798       |
| GO:0045449~regulation of transcription                                                         | 6.467E-06     | 0.011164208       |
| GO:0051171~regulation of nitrogen compound metabolic process                                   | 7.011E-06     | 0.012097722       |
| GO:0010556~regulation of macromolecule biosynthetic process                                    | 8.170E-06     | 0.014082748       |
| GO:0031323~regulation of cellular metabolic process                                            | 9.790E-06     | 0.016851289       |
| GO:0031326~regulation of cellular biosynthetic process                                         | 1.050E-05     | 0.018068114       |
| GO:0009889~regulation of biosynthetic process                                                  | 1.217E-05     | 0.02090386        |
| GO:0034645~cellular macromolecule biosynthetic process                                         | 1.943E-05     | 0.033174109       |
| GO:0009059~macromolecule biosynthetic process                                                  | 2.210E-05     | 0.03763295        |
| GO:0044249~cellular biosynthetic process                                                       | 3.433E-05     | 0.057849489       |
| GO:0044237~cellular metabolic process                                                          | 4.540E-05     | 0.075797676       |
| GO:0009058~biosynthetic process                                                                | 4.662E-05     | 0.07774929        |
| GO:0006350~transcription                                                                       | 6.750E-05     | 0.110579945       |
| GO:0043170~macromolecule metabolic process                                                     | 9.377E-05     | 0.150229934       |
| GO:0044238~primary metabolic process                                                           | 1.415E-04     | 0.217847832       |
| GO:0010467~gene expression                                                                     | 2.475E-04     | 0.349274363       |
| GO:0008152~metabolic process                                                                   | 5.423E-04     | 0.610002762       |
| GO:0065007~biological regulation                                                               | 1.806E-03     | 0.956630537       |
| GO:0050789~regulation of biological process                                                    | 2.932E-03     | 0.993885107       |
| GO:0006139~nucleobase, nucleoside, nucleotide and nucleic acid metabolic process               | 5.560E-03     | 0.9999374         |
| GO:0034641~cellular nitrogen compound metabolic process                                        | 7.427E-03     | 0.99997603        |
| GO:0006807~nitrogen compound metabolic process                                                 | 8.360E-03     | 0.99999531        |
| GO:0006355~regulation of transcription, DNA-dependent                                          | 1.355E-02     | 1                 |
| GO:0051252~regulation of RNA metabolic process                                                 | 1.754E-02     | 1                 |
| GO:0050794~regulation of cellular process                                                      | 2.004E-02     | 1                 |

| <b>NuRD</b>                                                                                             | <b>PValue</b> | <b>Bonferroni</b> |
|---------------------------------------------------------------------------------------------------------|---------------|-------------------|
| Enrichment Score: 6.661604476657148                                                                     |               |                   |
| <b>Term</b>                                                                                             | <b>PValue</b> | <b>Bonferroni</b> |
| GO:0048519~negative regulation of biological process                                                    | 2.03E-13      | 5.67E-10          |
| GO:0048523~negative regulation of cellular process                                                      | 3.97E-13      | 1.11E-09          |
| GO:0006357~regulation of transcription from RNA polymerase II promoter                                  | 4.49E-09      | 1.25E-05          |
| GO:0009890~negative regulation of biosynthetic process                                                  | 2.46E-07      | 6.86E-04          |
| GO:0031327~negative regulation of cellular biosynthetic process                                         | 4.64E-07      | 0.00129392        |
| GO:0010558~negative regulation of macromolecule biosynthetic process                                    | 5.09E-07      | 0.001418948       |
| GO:0031324~negative regulation of cellular metabolic process                                            | 6.34E-07      | 0.001766706       |
| GO:0009892~negative regulation of metabolic process                                                     | 7.81E-07      | 0.00217538        |
| GO:0010605~negative regulation of macromolecule metabolic process                                       | 1.75E-06      | 0.004869017       |
| GO:0016481~negative regulation of transcription                                                         | 5.05E-06      | 0.013984228       |
| GO:0000122~negative regulation of transcription from RNA polymerase II promoter                         | 5.38E-06      | 0.014895512       |
| GO:0045892~negative regulation of transcription, DNA-dependent                                          | 5.82E-06      | 0.016096568       |
| GO:0051253~negative regulation of RNA metabolic process                                                 | 6.76E-06      | 0.018661387       |
| GO:0010629~negative regulation of gene expression                                                       | 9.85E-06      | 0.027075959       |
| GO:0045934~negative regulation of nucleobase, nucleoside, nucleotide and nucleic acid metabolic process | 1.03E-05      | 0.0283823         |
| GO:0051172~negative regulation of nitrogen compound metabolic process                                   | 1.30E-05      | 0.03572734        |
| Enrichment Score: 6.166335196357349                                                                     |               |                   |
| <b>Term</b>                                                                                             | <b>PValue</b> | <b>Bonferroni</b> |
| GO:0032502~developmental process                                                                        | 7.62E-10      | 2.12E-06          |
| GO:0007275~multicellular organismal development                                                         | 1.14E-08      | 3.17E-05          |
| GO:0048856~anatomical structure development                                                             | 1.29E-08      | 3.60E-05          |
| GO:0048731~system development                                                                           | 4.94E-08      | 1.38E-04          |
| GO:0048869~cellular developmental process                                                               | 1.02E-07      | 2.85E-04          |

|                                               |          |             |
|-----------------------------------------------|----------|-------------|
| GO:0009653~anatomical structure morphogenesis | 2.10E-07 | 5.84E-04    |
| GO:0030154~cell differentiation               | 8.87E-07 | 0.00246882  |
| GO:0048513~organ development                  | 3.63E-06 | 0.010072738 |
| GO:0007399~nervous system development         | 1.08E-04 | 0.260500788 |
| GO:0032501~multicellular organismal process   | 0.52435  | 1           |

| <b>Sall4 - NuRD overlap</b>                                         | <b>PValue</b> | <b>Bonferroni</b> |
|---------------------------------------------------------------------|---------------|-------------------|
| Enrichment Score: 6.524009391117976                                 |               |                   |
| <b>Term</b>                                                         |               |                   |
| GO:0009653~anatomical structure morphogenesis                       | 1.60E-09      | 2.62E-06          |
| GO:0032502~developmental process                                    | 9.93E-09      | 1.63E-05          |
| GO:0007275~multicellular organismal development                     | 1.11E-08      | 1.81E-05          |
| GO:0048731~system development                                       | 2.23E-08      | 3.66E-05          |
| GO:0048856~anatomical structure development                         | 2.84E-08      | 4.65E-05          |
| GO:0009790~embryonic development                                    | 8.03E-08      | 1.31E-04          |
| GO:0048513~organ development                                        | 1.90E-07      | 3.10E-04          |
| GO:0048869~cellular developmental process                           | 6.78E-06      | 0.011037281       |
| GO:0030154~cell differentiation                                     | 2.06E-05      | 0.03309081        |
| GO:0032501~multicellular organismal process                         | 0.024306102   | 1                 |
| Enrichment Score: 5.761284204688291                                 |               |                   |
| <b>Term</b>                                                         |               |                   |
| GO:0009653~anatomical structure morphogenesis                       | 1.60E-09      | 2.62E-06          |
| GO:0048646~anatomical structure formation involved in morphogenesis | 2.92E-08      | 4.78E-05          |
| GO:0009790~embryonic development                                    | 8.03E-08      | 1.31E-04          |
| GO:0048598~embryonic morphogenesis                                  | 1.51E-06      | 0.002466881       |
| GO:0043009~chordate embryonic development                           | 1.77E-05      | 0.028594254       |
| GO:0009792~embryonic development ending in birth or egg hatching    | 2.04E-05      | 0.032789061       |
| GO:0001701~in utero embryonic development                           | 7.76E-05      | 0.119320201       |
| GO:0007389~pattern specification process                            | 5.12E-04      | 0.567647051       |
