# Supplementary material for: Characterization of Two Distinct Nucleosome Remodeling and Deacetylase (NuRD) Complex Assemblies in Embryonic Stem Cells
Source: Mol Cell Proteomics. 2015 Dec 29;15(3):878–91. doi: 10.1074/mcp.M115.053207 (PMC4813707; doi:10.1074/mcp.M115.053207)
Supplement: Supplemental Data [file 10.1074_M115.053207_mcp.M115.053207-1.pdf]

GSMEKRRWKKNFIAVSAANRFKKISSSGALDYDIPTTAS  
ENLYFQGE LAIPTTENLYFQSGELDYKDHDG DYKDHDID  
YKDDDDKCTCCIAQDKNISSRTVKLSAYINSNTRGVMEG  
RGSLLTCGDVEENP  
CBP 2 x Tev 3 x Flag

**Supplementary Figure S1. Amino acid sequence of the FTAP2 tag.** The FTAP2 tag contains the 3x FLAG peptide sequence, 2x TEV protease cleavage sites and the calmodulin binding peptide (CBP).
